# Supplementary material for: High-Sensitivity PD-L1 Staining Using Clone 73−10 Antibody and Spatial Transcriptomics for Precise Expression Analysis in Non-Tumorous, Intraepithelial Neoplasia, and Squamous Cell Carcinoma of Head and Neck
Source: Head Neck Pathol. 2025 May 20;19(1):65. doi: 10.1007/s12105-025-01798-8 (PMC12092928; doi:10.1007/s12105-025-01798-8)
Supplement: Supplementary file 1 — Supplementary Material 1 [file 12105_2025_1798_MOESM1_ESM.xlsx]

## Sheet: TMA for Visium
Visium TMA	sex	age	location
S1	M	56	buccal
S2	M	64	tongue
S3	F	67	tongue
S4	F	70	buccal
S5	M	62	tongue
S6	M	58	gingibv
