# Supplementary material for: High-Sensitivity PD-L1 Staining Using Clone 73−10 Antibody and Spatial Transcriptomics for Precise Expression Analysis in Non-Tumorous, Intraepithelial Neoplasia, and Squamous Cell Carcinoma of Head and Neck
Source: Head Neck Pathol. 2025 May 20;19(1):65. doi: 10.1007/s12105-025-01798-8 (PMC12092928; doi:10.1007/s12105-025-01798-8)
Supplement: Supplementary file 2 — Supplementary Material 2 [file 12105_2025_1798_MOESM2_ESM.xlsx]

## Sheet: TMA for IHC
Case No.	age 0:<65 1:≥65	sex 0:female 1:male	location	histological differentiation 0:well and moderate 0:poor	pT 0:pT1,2 1:pT3,4	pDOI 0:pDOI<10mm 1:pDOI≥10mm	pN 0:pN0,1 1:pN2,3	pENE 0:absence 1:presence	Ly 0:absence 1:presence	V 0:absence 1:presence	Pn 0:absence 1:presence	Invasion pattern 0; YK-1,2 1:YK-3,4c,d	DR 0:mature 1:immature	BUD 0:low 1:high	TILs 1:low 0:high	CD4 positive T-cell infiltration 1:low 0:high	CD8 positive T-cell infiltration 1:low 0:high	Immne-active 1:low 0:high	Survival time of OS and DSS	time of PFS (recurrence or death)	Ovarall Survival 0:survival 1:death	Disase specific survival 0:uthers or unknown 1:HNSCC specific desath,	Recurrence 0:absence 1:presence	Recurrence free suvival 0:no recurrence, no death, or unknown 1:recurrence or death	(73-10) NOM TC 0: score 0 1: score > 0	(73-10) SIN TC 0: score 0 1: score > 0	（73-10） HNSCC TC 0: score 0 1: score > 0
1	1	1	tongue	1	1	1	1	1	1	1	1	1	1	1	1	1	1	1	6	3	1	1	1	1	0	0	1
2	0	1	tongue	1	1	1	1	1	1	1	1	1	1	1	1	0	0	0	50	50	0	0	0	0	0	0	1
3	1	1	tongue	1	1	1	1	0	1	1	1	1	1	0	0	0	0	0	138	1	0	0	1	1	0	0	1
4	0	0	tongue	1	1	1	1	1	1	1	1	1	1	1	1	1	0	0	145	145	0	0	0	0	0	0	0
5	1	0	gingiva	0	1	1	1	0	1	1	1	1	0	0	0	0	0	0	142	142	0	0	0	0	0	0	1
6	1	1	tongue	1	1	1	1	1	1	1	1	1	1	1	1	1	1	1	10	4	1	1	1	1	0	0	1
7	0	1	tongue	1	1	1	1	1	1	1	1	1	1	1	0	0	1	0	6	4	1	1	1	1	0	0	1
8	0	1	tongue	0	1	1	1	0	1	1	1	1	1	0	0	0	0	0	73	73	0	0	0	0	0	0	1
9	1	1	tongue	1	1	1	0	0	1	1	1	1	0	0	1	0	1	0	130	130	0	0	0	0	0	0	1
10	0	1	tongue	1	1	0	0	0	1	1	1	1	1	0	1	0	1	0	121	121	0	0	0	0	0	0	1
11	0	1	tongue	0	1	1	0	0	1	1	1	0	1	1	1	1	1	1	14	14	0	0	0	0	0	0	0
12	1	0	tongue	1	1	1	0	0	1	1	1	1	1	1	1	1	1	1	100	5	0	0	1	1	0	0	1
13	1	1	buccal mucosa	1	1	1	1	1	1	1	1	1	1	1	1	1	1	1	7	4	1	1	1	1	0	0	1
14	1	1	tongue	1	1	1	0	0	1	1	1	1	0	1	0	0	0	0	42	42	1	0	0	1	0	0	1
15	1	1	tongue	1	1	1	0	0	1	1	1	1	1	1	1	1	1	1	126	126	0	0	0	0	0	0	0
16	0	1	tongue	1	1	0	1	0	1	1	1	1	1	1	1	0	1	0	62	62	0	0	0	0	0	0	0
17	1	1	tongue	1	1	1	0	0	1	1	1	0	1	0	1	1	1	1	9	6	1	1	1	1	1	1	1
18	1	0	tongue	0	1	1	0	0	1	1	1	1	1	0	0	1	1	1	61	61	0	0	0	0	0	0	0
19	1	0	tongue	1	1	0	0	0	0	0	0	1	0	0	0	0	0	0	114	114	0	0	0	0	0	0	0
20	1	1	buccal mucosa	1	1	0	1	1	1	1	1	1	1	1	1	1	1	1	92	9	1	1	1	1	0	0	0
21	1	0	buccal mucosa	0	1	1	0	0	1	1	1	1	1	1	0	1	0	0	110	110	0	0	0	0	0	0	0
22	1	1	tongue	1	1	1	1	1	1	1	1	0	0	0	0	0	0	0	17	17	0	0	0	0	0	0	1
23	1	0	tongue	0	1	0	0	0	1	0	0	0	0	0	0	1	0	0	94	87	1	1	1	1	1	1	1
24	1	0	gingiva	0	1	1	0	0	1	1	1	1	1	1	1	1	1	1	35	12	1	1	1	1	0	1	1
25	1	1	gingiva	0	1	0	0	0	1	1	1	1	1	0	1	0	0	0	103	103	1	0	0	1	0	0	1
26	0	0	tongue	0	1	1	1	0	1	1	1	1	1	1	1	1	1	1	49	10	1	1	1	1	0	0	1
27	1	1	tongue	0	1	1	0	0	1	0	1	1	1	1	1	1	0	0	11	5	1	1	1	1	0	0	1
28	1	0	tongue	0	1	1	1	1	1	1	1	1	1	1	1	0	1	0	10	9	1	1	1	1	0	0	1
29	0	1	tongue	0	1	1	1	0	1	1	1	1	0	1	0	0	0	0	16	6	1	1	1	1	0	0	1
30	0	1	tongue	1	1	1	1	1	1	1	1	1	1	1	1	0	0	0	11	1	1	1	1	1	0	0	1
31	0	0	gingiva	0	1	1	1	0	1	1	1	0	1	0	1	1	1	1	99	99	0	0	0	0	0	0	1
32	1	1	tongue	0	1	1	0	0	1	1	1	1	0	0	0	1	1	1	16	3	1	1	1	1	0	0	1
33	1	1	tongue	0	1	1	1	0	1	1	1	1	1	1	1	0	1	0	17	17	0	0	0	0	0	0	1
34	1	1	tongue	1	1	1	1	0	1	1	1	1	0	0	1	0	1	0	70	70	0	0	0	0	0	0	1
35	0	0	tongue	0	1	1	1	1	1	1	1	1	0	0	0	1	1	1	56	12	1	1	1	1	0	0	1
36	1	0	gingiva	0	1	1	1	1	1	1	1	0	1	0	0	0	0	0	5	5	1	1	0	1	0	0	1
37	0	1	tongue	1	1	1	1	0	1	1	1	1	1	1	1	1	1	1	89	89	0	0	0	0	0	0	1
38	1	1	tongue	0	1	1	1	0	1	1	0	1	1	0	1	0	0	0	49	11	0	0	1	1	0	0	1
39	1	1	tongue	1	1	1	1	0	1	1	1	1	1	0	1	1	1	1	8	8	1	1	0	1	0	0	1
40	1	0	tongue	1	1	1	0	0	0	1	1	0	1	1	1	0	1	0	47	47	1	0	0	1	0	0	1
41	0	0	gingiva	1	1	1	1	1	0	1	1	1	1	1	1	1	0	0	1	1	1	0	0	1	0	0	1
42	0	1	tongue	0	1	1	0	0	0	0	1	1	1	1	1	1	1	1	60	60	0	0	0	0	0	0	1
43	0	1	tongue	0	1	1	1	1	0	1	1	1	0	0	0	0	0	0	7	7	1	0	0	1	0	0	1
44	1	1	tongue	0	1	1	1	0	1	1	0	1	1	0	1	1	1	1	9	9	1	1	0	1	0	0	1
45	1	1	tongue	1	1	1	1	1	1	1	0	1	1	1	1	0	0	0	4	4	1	1	0	1	0	0	1
46	0	1	tongue	0	1	1	1	1	1	1	1	1	1	1	0	1	1	1	4	4	1	0	0	1	0	0	1
47	1	0	tongue	1	1	1	1	0	1	1	1	1	1	1	1	0	0	0	77	77	0	0	0	0	0	0	1
48	1	0	buccal mucosa	1	1	1	1	1	1	1	1	1	1	1	1	1	0	0	12	7	1	1	1	1	0	0	1
49	1	1	gingiva	0	1	1	0	0	1	0	0	1	1	0	1	0	1	0	73	73	0	0	0	0	0	0	1
50	1	1	tongue	1	1	1	1	0	1	1	1	1	1	1	0	0	1	0	23	23	1	0	0	1	0	0	1
51	1	0	gingiva	0	1	1	0	0	1	1	1	1	1	0	1	0	1	0	72	72	0	0	0	0	0	0	1
52	1	1	tongue	1	1	1	1	0	1	1	1	1	1	1	0	0	0	0	6	2	0	0	1	1	0	1	1
53	1	1	buccal mucosa	0	1	1	0	0	0	0	0	1	0	0	0	1	0	0	59	59	0	0	0	0	0	1	1
54	1	0	gingiva	0	1	1	0	0	1	1	1	1	0	1	1	1	0	0	8	8	1	0	0	1	0	0	1
55	1	1	gingiva	1	1	1	0	0	1	1	1	1	1	1	1	1	1	1	8	8	1	1	0	1	0	0	1
56	1	0	tongue	1	1	1	0	0	1	0	1	1	1	1	1	1	1	1	68	68	0	0	0	0	0	0	1
57	1	0	tongue	1	1	1	0	0	1	0	1	1	1	1	0	1	0	0	60	60	0	0	0	0	0	0	1
58	1	1	gingiva	0	1	1	0	0	1	1	1	1	0	0	1	1	1	1	9	9	1	0	0	1	0	1	0
59	1	0	gingiva	1	1	1	1	1	1	1	1	1	1	1	0	0	0	0	65	65	0	0	0	0	0	0	1
60	0	0	tongue	0	1	1	1	0	1	1	1	1	1	1	1	1	1	1	15	4	1	1	1	1	0	0	1
61	1	1	tongue	0	1	1	1	1	1	1	1	1	1	1	0	0	1	0	16	9	1	0	1	1	0	1	1
62	0	1	gingiva	0	1	1	0	0	1	1	0	1	0	0	1	1	1	1	63	63	0	0	0	0	0	0	1
63	0	1	tongue	0	1	1	1	0	1	1	1	1	1	1	1	1	1	1	25	25	1	1	0	1	0	0	0
64	1	1	tongue	0	1	1	1	1	1	1	1	1	0	0	1	1	1	1	10	10	1	1	0	1	0	0	1
65	1	1	tongue	0	1	1	0	0	1	1	1	1	1	0	1	1	1	1	29	29	1	1	0	1	0	0	1
66	1	1	tongue	0	1	1	1	0	1	1	1	1	1	1	1	0	1	0	79	79	1	1	0	1	0	0	1
67	1	1	tongue	0	1	1	1	0	1	1	1	1	1	1	1	1	0	0	54	54	0	0	0	0	0	0	0
68	1	1	tongue	0	1	1	1	0	0	1	0	1	1	0	1	1	1	1	58	58	0	0	0	0	0	1	0
69	1	1	tongue	1	1	1	0	0	0	0	0	1	0	0	1	1	1	1	59	59	0	0	0	0	0	0	1
70	1	1	gingiva	0	1	1	1	0	1	1	1	1	0	1	1	1	1	1	57	57	0	0	0	0	0	0	0
71	1	1	tongue	0	1	1	1	1	1	1	0	1	1	1	1	1	1	1	39	39	0	0	0	0	0	0	1
72	1	0	gingiva	0	1	1	0	0	0	1	0	1	0	0	0	0	1	0	20	20	0	0	0	0	0	0	1
73	0	1	tongue	0	1	1	0	0	1	1	1	1	0	0	0	0	1	0	112	61	0	0	1	1	0	1	1
74	1	1	gingiva	0	1	1	0	0	1	1	1	1	1	1	1	1	1	1	10	10	1	0	0	1	0	0	1
75	1	1	gingiva	0	1	1	1	0	0	1	0	1	1	1	0	0	1	0	50	50	0	0	0	0	0	0	1
76	1	0	tongue	0	1	1	0	0	0	0	1	0	1	1	1	1	1	1	51	51	0	0	0	0	0	0	0
77	0	1	tongue	1	1	1	0	0	0	1	1	1	0	0	0	0	0	0	49	49	0	0	0	0	0	0	1
78	1	0	gingiva	0	1	1	0	0	1	1	0	1	1	1	0	1	0	0	50	50	0	0	0	0	0	0	1
79	0	0	tongue	0	1	1	0	0	1	1	1	1	1	1	1	0	1	0	49	49	0	0	0	0	0	0	1
80	1	1	buccal mucosa	1	1	1	0	0	0	1	1	1	1	0	1	1	1	1	49	49	0	0	0	0	0	0	0
81	0	0	tongue	0	1	0	0	0	0	0	0	1	1	0	0	0	0	0	180	180	0	0	0	0	0	0	0
82	0	1	oral floor	0	1	1	1	0	1	1	0	1	1	0	1	0	1	0	29	13	1	0	1	1	0	0	1
83	1	0	gingiva	0	1	1	1	1	1	1	1	1	1	1	1	0	1	0	7	7	1	0	0	1	0	0	1
84	1	0	tongue	0	1	0	0	0	0	1	1	1	1	1	0	0	1	0	45	7	0	0	1	1	0	0	1
85	1	1	gingiva	1	1	1	0	0	0	0	0	1	1	0	0	1	1	1	7	5	0	0	1	1	0	0	0
86	0	0	gingiva	0	1	0	0	0	0	0	0	0	0	0	0	1	1	1	42	42	0	0	0	0	0	0	0
87	0	0	tongue	1	1	0	1	1	1	1	1	1	1	1	1	1	1	1	3	3	1	1	0	1	0	0	1
88	1	1	tongue	0	1	1	0	0	1	1	1	1	1	1	1	0	1	0	42	7	0	0	1	1	0	0	1
89	1	1	tongue	0	1	1	0	0	1	1	0	1	1	0	1	0	0	0	7	5	0	0	1	1	0	0	1
90	1	1	gingiva	1	1	1	0	0	1	1	1	1	1	1	1	1	1	1	36	15	1	1	1	1	0	0	1
91	0	0	tongue	1	1	1	0	0	0	1	1	1	1	0	0	1	0	0	41	41	0	0	0	0	0	0	0
92	0	0	gingiva	1	1	1	1	1	1	0	0	1	0	1	1	1	0	0	40	40	0	0	0	0	0	0	1
93	1	1	gingiva	0	1	1	0	0	0	0	1	1	0	0	1	0	1	0	40	4	0	0	1	1	0	1	1
94	1	0	gingiva	0	1	1	1	1	1	1	1	1	1	0	1	1	1	1	38	38	0	0	0	0	0	0	0
HNSCC, head and neck squamous cell carcinoma; SIN, squamous intraepitheliaul neoplasm; NOM, normal; DOI, depth of invasion; Ly, lymphovascular invasion; V, vascular invasion; Pn, perineural invasion; DR, desmoplastic reaction, BUD, budding; TILs, tumor infiltrating lymphocytes; OS, ovarall survival, DSS, disease specific survival; RFS, recurrence free survival.
