# Supplementary material for: High-Sensitivity PD-L1 Staining Using Clone 73−10 Antibody and Spatial Transcriptomics for Precise Expression Analysis in Non-Tumorous, Intraepithelial Neoplasia, and Squamous Cell Carcinoma of Head and Neck
Source: Head Neck Pathol. 2025 May 20;19(1):65. doi: 10.1007/s12105-025-01798-8 (PMC12092928; doi:10.1007/s12105-025-01798-8)
Supplement: Supplementary file 3 — Supplementary Material 3 [file 12105_2025_1798_MOESM3_ESM.xlsx]

## Sheet: Sheet1
p_val	avg_log2FC	pct.1	pct.2	p_val_adj	cluster	gene	sample	avg_log2FC
1.32126e-18	2.27032	0.993	0.815	2.3854e-14	HNSCC	AKT1	S1	2.27032
1.61778e-29	4.91133	0.978	0.802	2.92074e-25	HNSCC	AKT1	S2	4.91133
1.87913e-25	6.83703	0.921	0.643	3.39259e-21	HNSCC	AKT1	S3	6.83703
5.3288e-38	6.60305	1	0.93	9.62062e-34	HNSCC	AKT1	S4	6.60305
6.91118e-10	3.18024	0.983	0.843	1.24774e-05	HNSCC	AKT1	S5	3.18024
0.000494301	1.00944	0.857	0.682	1	HNSCC	AKT1	S6	1.00944
0.0053323	2.92295	0.742	0.7	1	NOM	AKT2	S2	2.92295
0.00169043	3.55789	0.703	0.547	1	SIN	AKT2	S3	3.55789
2.11224e-19	0.388236	0.981	0.779	3.81343e-15	HNSCC	AKT2	S4	0.388236
7.72035e-06	2.76021	0.713	0.588	0.139383	NOM	AKT2	S5	2.76021
2.37329e-07	1.30115	0.551	0.284	0.00428473	HNSCC	AKT3	S1	1.30115
8.67338e-09	0.554185	0.482	0.265	0.000156589	HNSCC	AKT3	S2	0.554185
1.77634e-19	1.3408	0.524	0.161	3.20701e-15	HNSCC	AKT3	S3	1.3408
1.6505e-08	1.74373	0.731	0.417	0.000297982	SIN	AKT3	S4	1.74373
8.97238e-14	1.15665	0.69	0.395	1.61987e-09	HNSCC	AKT3	S4	1.15665
1.34043e-07	1.22232	0.496	0.229	0.00242002	HNSCC	AKT3	S5	1.22232
0.000744809	0.436654	0.188	0.073	1	HNSCC	BATF	S1	0.436654
8.31042e-13	1.56006	0.272	0.083	1.50036e-08	HNSCC	BATF	S2	1.56006
6.59595e-07	0.496107	0.223	0.071	0.0119083	HNSCC	BATF	S3	0.496107
1.78277e-08	3.4682	0.315	0.106	0.000321861	SIN	BATF	S4	3.4682
7.67155e-10	4.75725	0.191	0.053	1.38502e-05	HNSCC	BATF2	S2	4.75725
7.82384e-09	0.493203	0.201	0.039	0.000141252	HNSCC	BATF3	S3	0.493203
3.86163e-07	1.42599	0.324	0.125	0.00697179	SIN	BATF3	S4	1.42599
0.00118631	0.443072	0.35	0.193	1	HNSCC	BID	S5	0.443072
0.000276682	0.440996	0.359	0.193	1	HNSCC	BIRC3	S5	0.440996
0.00459629	0.522515	0.368	0.218	1	HNSCC	BIRC5	S5	0.522515
0.000362215	0.8663	0.556	0.364	1	HNSCC	CASP2	S5	0.8663
5.52719e-05	1.27766	0.47	0.289	0.997878	HNSCC	CASP7	S5	1.27766
6.75239e-05	0.268438	0.129	0.05	1	HNSCC	CD247	S2	0.268438
3.55718e-06	0.888922	0.243	0.051	0.0642213	SIN	CD247	S3	0.888922
1.74652e-10	0.712544	0.213	0.037	3.15317e-06	SIN	CD247	S4	0.712544
0.00797342	0.326839	0.194	0.069	1	SIN	CD247	S5	0.326839
3.7225e-08	1.6346	0.428	0.181	0.00067206	HNSCC	CD274	S1	1.6346
0.000253602	0.746409	0.324	0.212	1	HNSCC	CD274	S2	0.746409
0.000864614	0.358881	0.175	0.079	1	HNSCC	CD274	S3	0.358881
8.99268e-12	1.11765	0.684	0.395	1.62354e-07	HNSCC	CD274	S4	1.11765
4.21938e-07	0.262043	0.176	0.061	0.00761767	HNSCC	CD28	S2	0.262043
1.78128e-05	0.68247	0.223	0.089	0.321593	HNSCC	CD28	S3	0.68247
6.23745e-21	5.35229	0.519	0.125	1.12611e-16	SIN	CD28	S4	5.35229
3.57839e-05	0.861805	0.306	0.086	0.646042	SIN	CD28	S5	0.861805
0.00280551	0.911185	0.254	0.134	1	HNSCC	CD3D	S1	0.911185
2.65574e-14	0.956147	0.353	0.131	4.79467e-10	HNSCC	CD3D	S2	0.956147
2.40764e-05	0.540236	0.351	0.112	0.434676	SIN	CD3D	S3	0.540236
0.00113861	0.333043	0.183	0.086	1	HNSCC	CD3D	S3	0.333043
3.84337e-08	3.05964	0.37	0.148	0.000693882	SIN	CD3D	S4	3.05964
0.00010653	0.67641	0.283	0.129	1	HNSCC	CD3E	S1	0.67641
2.98182e-10	0.691244	0.268	0.099	5.38337e-06	HNSCC	CD3E	S2	0.691244
1.67736e-09	0.996902	0.405	0.087	3.02831e-05	SIN	CD3E	S3	0.996902
0.00576148	0.356882	0.153	0.075	1	HNSCC	CD3E	S3	0.356882
7.74763e-11	8.87148	0.37	0.123	1.39876e-06	SIN	CD3E	S4	8.87148
1.28826e-05	0.88562	0.278	0.066	0.232583	SIN	CD3E	S5	0.88562
0.00841764	0.333358	0.254	0.142	1	HNSCC	CD3G	S1	0.333358
5.5562e-10	0.751836	0.29	0.115	1.00312e-05	HNSCC	CD3G	S2	0.751836
0.00116913	0.514235	0.189	0.055	1	SIN	CD3G	S3	0.514235
7.62487e-15	4.78709	0.38	0.093	1.37659e-10	SIN	CD3G	S4	4.78709
2.77069e-06	1.64675	0.361	0.105	0.0500221	SIN	CD3G	S5	1.64675
0.00141869	1.41924	0.406	0.25	1	HNSCC	CD4	S1	1.41924
0.00766693	0.327374	0.405	0.278	1	SIN	CD4	S2	0.327374
1.55631e-11	2.48434	0.434	0.214	2.80976e-07	HNSCC	CD4	S2	2.48434
1.12102e-05	2.13648	0.595	0.284	0.202389	SIN	CD4	S3	2.13648
3.82139e-08	0.887606	0.432	0.204	0.000689914	HNSCC	CD4	S3	0.887606
1.56653e-27	26.9997	0.889	0.525	2.82822e-23	SIN	CD4	S4	26.9997
0.000717524	0.492702	0.639	0.377	1	SIN	CD4	S5	0.492702
9.68993e-05	0.983588	0.638	0.414	1	HNSCC	CHUK	S1	0.983588
0.00465032	0.564224	0.57	0.436	1	SIN	CHUK	S2	0.564224
1.54349e-11	0.827853	0.651	0.368	2.78661e-07	HNSCC	CHUK	S3	0.827853
9.70401e-16	1.08589	0.903	0.603	1.75196e-11	HNSCC	CHUK	S4	1.08589
9.16942e-06	1.5029	0.385	0.189	0.165545	HNSCC	CSF2RB	S5	1.5029
6.74516e-06	1.41118	0.616	0.375	0.121777	HNSCC	CSNK2A1	S1	1.41118
1.06476e-15	1.99656	0.643	0.36	1.92232e-11	HNSCC	CSNK2A1	S2	1.99656
5.84223e-08	0.984725	0.507	0.286	0.00105476	HNSCC	CSNK2A1	S3	0.984725
7.81151e-05	0.546983	0.684	0.514	1	HNSCC	CSNK2A1	S4	0.546983
0.0092482	2.02987	0.611	0.396	1	SIN	CSNK2A1	S5	2.02987
0.00549825	1.58465	0.659	0.805	1	NOM	CSNK2A2	S1	1.58465
8.39205e-05	0.616259	0.877	0.707	1	HNSCC	CSNK2A2	S1	0.616259
6.88447e-28	3.37936	0.926	0.679	1.24292e-23	HNSCC	CSNK2A2	S2	3.37936
9.95281e-22	8.98191	0.847	0.518	1.79688e-17	HNSCC	CSNK2A2	S3	8.98191
1.18131e-05	0.33961	0.694	0.877	0.213274	SIN	CSNK2A2	S4	0.33961
1.5339e-21	2.42308	1	0.777	2.7693e-17	HNSCC	CSNK2A2	S4	2.42308
9.62618e-06	1.24472	0.533	0.265	0.173791	HNSCC	CSNK2A2	S6	1.24472
0.000460957	7.45477	0.875	0.798	1	NOM	CSNK2B	S1	7.45477
7.59937e-13	10.2407	0.857	0.693	1.37199e-08	HNSCC	CSNK2B	S2	10.2407
5.15508e-21	17.0578	0.9	0.611	9.30699e-17	HNSCC	CSNK2B	S3	17.0578
5.6201e-16	3.67481	0.955	0.813	1.01465e-11	HNSCC	CSNK2B	S4	3.67481
0.0027345	2.31544	0.573	0.468	1	HNSCC	CTSH	S5	2.31544
1.81582e-13	6.71878	0.684	0.314	3.27828e-09	HNSCC	CTSK	S5	6.71878
3.08605e-06	1.68403	0.786	0.539	0.0557156	HNSCC	CTSL	S5	1.68403
1.70514e-13	2.57935	0.812	0.482	3.07846e-09	HNSCC	CTSS	S5	2.57935
0.00794146	0.579912	0.911	0.852	1	SIN	EGFR	S2	0.579912
5.52454e-11	3.07926	0.941	0.814	9.97401e-07	HNSCC	EGFR	S2	3.07926
6.35159e-26	2.65942	0.943	0.689	1.14672e-21	HNSCC	EGFR	S3	2.65942
9.44201e-09	2.10631	0.829	0.508	0.000170466	HNSCC	EGFR	S6	2.10631
1.79238e-10	1.69317	0.891	0.625	3.23596e-06	HNSCC	EML4	S1	1.69317
7.39642e-09	3.63211	0.797	0.605	0.000133535	SIN	EML4	S2	3.63211
1.19056e-15	0.961225	0.734	0.396	2.14944e-11	HNSCC	EML4	S3	0.961225
0.00910126	2.17997	0.694	0.562	1	SIN	EML4	S5	2.17997
0.00857223	0.925129	0.529	0.36	1	SIN	EML4	S6	0.925129
3.3139e-08	2.80951	0.701	0.454	0.000598291	HNSCC	FADD	S5	2.80951
1.18377e-05	10.9026	0.958	0.988	0.213717	NOM	FOS	S2	10.9026
5.19137e-09	45.0137	1	0.932	9.37249e-05	HNSCC	FOS	S3	45.0137
4.47488e-12	319.007	0.992	0.995	8.07895e-08	NOM	FOS	S4	319.007
3.15294e-11	23.1917	0.97	0.966	5.69232e-07	NOM	FOS	S5	23.1917
8.25105e-09	59.4771	1	0.917	0.000148964	HNSCC	FOS	S6	59.4771
7.05163e-14	4.9589	0.453	0.129	1.2731e-09	HNSCC	GZMB	S5	4.9589
9.91597e-07	2.55114	0.807	0.638	0.0179023	NOM	HIF1A	S1	2.55114
8.4853e-15	2.6017	0.739	0.517	1.53194e-10	HNSCC	HIF1A	S2	2.6017
1.3443e-15	2.13634	0.707	0.4	2.427e-11	HNSCC	HIF1A	S3	2.13634
5.2476e-31	4.32838	0.961	0.67	9.47401e-27	HNSCC	HIF1A	S4	4.32838
1.49044e-05	0.788538	0.495	0.242	0.269084	HNSCC	HIF1A	S6	0.788538
6.91482e-19	1.13765	0.974	0.806	1.2484e-14	HNSCC	HRAS	S2	1.13765
4.54586e-21	5.22498	0.934	0.671	8.2071e-17	HNSCC	HRAS	S3	5.22498
4.74937e-25	9.36578	1	0.823	8.57451e-21	HNSCC	HRAS	S4	9.36578
3.37987e-11	1.78476	0.933	0.689	6.10201e-07	HNSCC	HRAS	S6	1.78476
0.00799146	0.679167	0.419	0.304	1	HNSCC	HTRA2	S5	0.679167
0.00040593	1.18463	0.123	0.03	1	HNSCC	IFNG	S1	1.18463
8.87372e-06	1.01945	0.913	0.737	0.160206	HNSCC	IFNGR1	S1	1.01945
4.34922e-63	10.0389	0.982	0.675	7.85209e-59	HNSCC	IFNGR1	S2	10.0389
8.93288e-06	4.40803	0.865	0.669	0.161274	SIN	IFNGR1	S3	4.40803
5.32475e-40	47.2914	1	0.896	9.6133e-36	HNSCC	IFNGR1	S4	47.2914
3.6669e-07	8.31455	0.972	0.72	0.00662022	SIN	IFNGR1	S5	8.31455
4.6048e-17	3.86762	0.886	0.424	8.3135e-13	HNSCC	IFNGR1	S6	3.86762
1.0306e-24	6.68422	0.938	0.739	1.86065e-20	HNSCC	IFNGR2	S2	6.68422
3.30074e-06	8.27889	0.892	0.746	0.0595916	SIN	IFNGR2	S3	8.27889
2.67728e-06	2.84998	0.752	0.47	0.0483357	HNSCC	IFNGR2	S6	2.84998
1.10036e-17	1.93381	1	0.892	1.98659e-13	HNSCC	IKBKB	S1	1.93381
2.27585e-07	7.01708	0.892	0.676	0.00410883	SIN	IKBKB	S3	7.01708
2.70381e-06	8.89901	0.871	0.753	0.0488145	NOM	IKBKB	S5	8.89901
1.64553e-16	1.38828	0.971	0.728	2.97084e-12	HNSCC	IKBKG	S1	1.38828
2.84872e-41	4.3717	0.93	0.673	5.14308e-37	HNSCC	IKBKG	S2	4.3717
4.2813e-12	2.69161	0.738	0.482	7.72946e-08	HNSCC	IKBKG	S3	2.69161
9.62148e-13	1.88157	0.916	0.688	1.73706e-08	HNSCC	IKBKG	S4	1.88157
5.09714e-14	2.41174	0.924	0.606	9.20238e-10	HNSCC	IKBKG	S6	2.41174
2.62393e-06	0.772959	0.393	0.179	0.0473724	HNSCC	IL3RA	S5	0.772959
2.26556e-18	2.46553	0.901	0.683	4.09024e-14	HNSCC	JAK1	S2	2.46553
2.64262e-17	2.2393	0.812	0.521	4.77098e-13	HNSCC	JAK1	S3	2.2393
8.05264e-06	2.44827	0.562	0.326	0.145382	HNSCC	JAK1	S6	2.44827
6.93083e-07	1.74046	0.775	0.543	0.0125129	HNSCC	JAK2	S1	1.74046
0.00174742	0.720723	0.558	0.482	1	NOM	JAK2	S2	0.720723
1.01238e-06	3.04778	0.622	0.273	0.0182776	SIN	JAK2	S3	3.04778
0.00580526	2.37751	0.898	0.785	1	SIN	JAK2	S4	2.37751
6.02052e-08	2.43572	0.604	0.314	0.00108695	NOM	JAK2	S5	2.43572
0.000105063	29.6617	0.929	0.972	1	NOM	JUN	S2	29.6617
1.2397e-12	24.3578	0.973	0.879	2.23816e-08	SIN	JUN	S3	24.3578
0.000640155	5.25264	0.922	0.957	1	SIN	JUN	S6	5.25264
7.63916e-09	0.933729	0.754	0.564	0.000137917	HNSCC	KRAS	S2	0.933729
0.00054904	1.77574	0.595	0.356	1	SIN	KRAS	S3	1.77574
1.05999e-08	0.725884	0.884	0.694	0.000191371	HNSCC	KRAS	S4	0.725884
8.5621e-05	1.3668	0.554	0.358	1	NOM	KRAS	S5	1.3668
3.85654e-09	1.07996	0.714	0.409	6.9626e-05	HNSCC	KRAS	S6	1.07996
1.56493e-15	1.60675	0.688	0.302	2.82533e-11	HNSCC	LAT	S1	1.60675
3.45388e-05	2.09771	0.443	0.245	0.623563	SIN	LAT	S2	2.09771
0.000139695	0.423019	0.351	0.123	1	SIN	LAT	S3	0.423019
0.00188137	0.256737	0.192	0.096	1	HNSCC	LAT	S3	0.256737
0.00101031	4.1152	0.435	0.296	1	SIN	LAT	S4	4.1152
0.000407401	0.830378	0.417	0.177	1	SIN	LAT	S5	0.830378
1.10321e-05	0.746173	0.41	0.159	0.199174	HNSCC	LAT	S6	0.746173
0.000391019	0.48409	0.254	0.116	1	HNSCC	LCK	S1	0.48409
2.76498e-08	0.907766	0.228	0.085	0.000499189	HNSCC	LCK	S2	0.907766
0.00396897	0.377485	0.127	0.054	1	HNSCC	LCK	S3	0.377485
1.16317e-12	5.15823	0.361	0.1	2.09999e-08	SIN	LCK	S4	5.15823
4.4181e-21	13.2857	0.949	0.629	7.97643e-17	HNSCC	LMNB2	S5	13.2857
1.09087e-05	3.56314	0.717	0.565	0.196946	HNSCC	MAP2K1	S1	3.56314
2.28065e-35	7.15031	0.886	0.558	4.11749e-31	HNSCC	MAP2K1	S2	7.15031
9.25871e-09	1.63189	0.897	0.725	0.000167157	HNSCC	MAP2K1	S4	1.63189
2.4e-18	2.35854	0.934	0.743	4.33297e-14	HNSCC	MAP2K2	S3	2.35854
8.3468e-10	2.45552	0.914	0.629	1.50693e-05	HNSCC	MAP2K2	S6	2.45552
8.84541e-07	5.57415	0.919	0.763	0.0159695	SIN	MAP2K3	S3	5.57415
4.17041e-06	1.43323	0.406	0.194	0.0752925	HNSCC	MAP2K6	S1	1.43323
8.62878e-06	0.408081	0.212	0.099	0.155784	NOM	MAP2K6	S2	0.408081
1.28999e-05	0.310976	0.189	0.034	0.232895	SIN	MAP2K6	S3	0.310976
0.00117745	0.296655	0.219	0.112	1	HNSCC	MAP2K6	S4	0.296655
0.00806277	0.279536	0.149	0.064	1	NOM	MAP2K6	S5	0.279536
9.52217e-07	0.425699	0.306	0.064	0.0171913	SIN	MAP2K6	S5	0.425699
5.308e-08	0.887885	0.45	0.236	0.000958306	HNSCC	MAP3K3	S3	0.887885
5.93768e-05	1.01541	0.722	0.391	1	SIN	MAP3K3	S5	1.01541
0.000972229	1.72164	0.667	0.496	1	HNSCC	MAP3K5	S5	1.72164
8.18543e-25	4.59372	0.945	0.792	1.4778e-20	HNSCC	MAPK1	S2	4.59372
2.39378e-22	10.8313	0.908	0.639	4.32172e-18	HNSCC	MAPK1	S3	10.8313
3.35189e-06	0.539523	0.889	0.928	0.0605151	SIN	MAPK1	S4	0.539523
1.20328e-15	1.13885	0.987	0.894	2.1724e-11	HNSCC	MAPK1	S4	1.13885
0.000720167	5.27231	0.833	0.734	1	SIN	MAPK1	S5	5.27231
0.00209663	0.589777	0.6	0.402	1	HNSCC	MAPK1	S6	0.589777
2.28479e-14	1.06161	0.449	0.192	4.12496e-10	HNSCC	MAPK11	S2	1.06161
4.54456e-18	2.70594	0.524	0.175	8.20475e-14	HNSCC	MAPK11	S3	2.70594
0.00589283	0.665315	0.323	0.469	1	NOM	MAPK11	S4	0.665315
0.000125348	1.18498	0.5	0.216	1	SIN	MAPK11	S5	1.18498
1.19502e-07	0.463863	0.254	0.109	0.00215749	HNSCC	MAPK12	S2	0.463863
3.98766e-21	1.54647	0.537	0.154	7.19933e-17	HNSCC	MAPK12	S3	1.54647
0.000628543	0.330427	0.481	0.312	1	SIN	MAPK12	S4	0.330427
1.97274e-05	1.11775	0.477	0.294	0.356159	HNSCC	MAPK12	S4	1.11775
0.000241866	1.75367	0.977	0.936	1	NOM	MAPK13	S1	1.75367
0.00306647	0.610223	0.714	0.515	1	HNSCC	MAPK13	S6	0.610223
2.43933e-08	2.06433	0.809	0.663	0.000440397	HNSCC	MAPK14	S2	2.06433
1.6212e-07	6.58886	0.773	0.557	0.00292692	HNSCC	MAPK14	S3	6.58886
0.00677621	3.32179	0.663	0.632	1	NOM	MAPK14	S5	3.32179
2.52006e-05	0.652436	0.629	0.348	0.454972	HNSCC	MAPK14	S6	0.652436
2.20244e-05	6.40551	0.875	0.73	0.397628	NOM	MAPK3	S1	6.40551
0.00017561	5.10261	0.876	0.802	1	NOM	MAPK3	S2	5.10261
0.00137343	1.3173	0.797	0.742	1	NOM	MAPK3	S4	1.3173
8.00044e-07	5.84579	0.703	0.507	0.014444	NOM	MAPK3	S5	5.84579
0.000646627	4.53649	0.636	0.367	1	NOM	MAPK3	S6	4.53649
1.94593e-07	2.00804	0.833	0.625	0.00351318	HNSCC	MTOR	S1	2.00804
4.78909e-20	2.46321	0.838	0.592	8.64622e-16	HNSCC	MTOR	S2	2.46321
8.45462e-13	0.945075	0.672	0.368	1.5264e-08	HNSCC	MTOR	S3	0.945075
3.91472e-27	5.04612	0.968	0.706	7.06764e-23	HNSCC	MTOR	S4	5.04612
3.47142e-07	1.01662	0.676	0.371	0.00626731	HNSCC	MTOR	S6	1.01662
7.02208e-07	1.70299	0.835	0.736	0.0126777	SIN	MYD88	S2	1.70299
0.000192202	6.3152	0.865	0.725	1	SIN	MYD88	S3	6.3152
0.00211765	4.18043	0.639	0.801	1	SIN	MYD88	S5	4.18043
4.78119e-13	1.77869	0.471	0.236	8.63196e-09	HNSCC	NFATC1	S2	1.77869
8.94192e-16	1.58204	0.581	0.243	1.61437e-11	HNSCC	NFATC1	S3	1.58204
9.24996e-05	1.24459	0.63	0.47	1	SIN	NFATC1	S4	1.24459
1.97657e-05	0.397258	0.722	0.418	0.356849	SIN	NFATC1	S5	0.397258
0.000478496	0.727561	0.362	0.203	1	HNSCC	NFATC2	S1	0.727561
1.91106e-08	1.88089	0.432	0.119	0.000345022	SIN	NFATC2	S3	1.88089
5.73569e-13	5.44963	0.583	0.262	1.03552e-08	SIN	NFATC2	S4	5.44963
5.77636e-07	2.87794	0.783	0.625	0.0104286	HNSCC	NFATC3	S1	2.87794
9.36138e-06	2.58092	0.785	0.626	0.16901	SIN	NFATC3	S2	2.58092
6.62432e-22	1.12069	0.857	0.527	1.19596e-17	HNSCC	NFATC3	S2	1.12069
3.78558e-15	2.52557	0.594	0.261	6.83449e-11	HNSCC	NFATC3	S3	2.52557
5.45925e-11	3.78663	0.903	0.686	9.85613e-07	HNSCC	NFATC3	S4	3.78663
1.13949e-05	1.21953	0.525	0.304	0.205723	NOM	NFATC3	S5	1.21953
1.83938e-07	1.81036	0.694	0.327	0.00332081	SIN	NFATC3	S5	1.81036
0.00943135	0.897363	0.276	0.152	1	HNSCC	NFATC3	S6	0.897363
1.32369e-11	2.25907	0.877	0.716	2.3898e-07	HNSCC	NFKB1	S1	2.25907
2.09153e-66	7.37547	0.96	0.62	3.77606e-62	HNSCC	NFKB1	S2	7.37547
1.46327e-26	2.03656	0.869	0.479	2.64178e-22	HNSCC	NFKB1	S3	2.03656
1.97361e-06	0.659498	0.972	0.701	0.0356315	SIN	NFKB1	S5	0.659498
1.79092e-08	0.963166	0.838	0.515	0.000323333	HNSCC	NFKB1	S6	0.963166
1.6367e-17	9.28584	0.971	0.844	2.95489e-13	HNSCC	NFKBIA	S2	9.28584
0.000789293	0.348895	0.572	0.371	1	HNSCC	NFKBIB	S1	0.348895
1.82891e-07	1.28334	0.581	0.438	0.00330192	HNSCC	NFKBIB	S2	1.28334
2.83795e-06	1.00087	0.555	0.379	0.0512363	HNSCC	NFKBIB	S3	1.00087
0.00845169	0.431	0.438	0.265	1	HNSCC	NFKBIB	S6	0.431
2.13701e-06	0.787554	0.399	0.172	0.0385816	HNSCC	NFKBIE	S1	0.787554
0.00625665	0.319678	0.304	0.182	1	SIN	NFKBIE	S2	0.319678
6.56749e-08	0.828596	0.301	0.137	0.0011857	HNSCC	NFKBIE	S2	0.828596
1.30722e-14	2.14796	0.515	0.214	2.36005e-10	HNSCC	NFKBIE	S3	2.14796
3.13977e-24	5.53641	0.882	0.571	5.66855e-20	HNSCC	NRAS	S3	5.53641
0.00355938	0.330091	0.13	0.047	1	HNSCC	PDCD1	S1	0.330091
8.82316e-07	0.377021	0.132	0.038	0.0159293	HNSCC	PDCD1	S2	0.377021
5.62337e-06	0.34599	0.157	0.039	0.101524	SIN	PDCD1	S4	0.34599
4.68693e-10	1.47152	0.884	0.672	8.46178e-06	HNSCC	PIK3CA	S1	1.47152
5.22117e-12	1.47926	0.739	0.511	9.42629e-08	HNSCC	PIK3CA	S2	1.47926
8.5486e-21	2.50177	0.786	0.454	1.54336e-16	HNSCC	PIK3CA	S3	2.50177
6.7534e-22	6.57221	0.974	0.803	1.21926e-17	HNSCC	PIK3CA	S4	6.57221
3.73645e-06	2.15296	0.889	0.662	0.0674579	SIN	PIK3CA	S5	2.15296
1.77082e-11	5.80552	0.79	0.447	3.19703e-07	HNSCC	PIK3CA	S6	5.80552
1.28548e-14	1.81363	0.899	0.647	2.32081e-10	HNSCC	PIK3CB	S1	1.81363
3.83126e-09	4.06181	0.772	0.586	6.91696e-05	SIN	PIK3CB	S2	4.06181
5.20612e-17	2.94551	0.751	0.421	9.39913e-13	HNSCC	PIK3CB	S3	2.94551
1.59444e-28	4.84058	0.987	0.758	2.87861e-24	HNSCC	PIK3CB	S4	4.84058
1.09864e-12	4.47258	0.889	0.391	1.98348e-08	SIN	PIK3CB	S5	4.47258
7.27249e-10	1.61613	0.594	0.293	1.31298e-05	HNSCC	PIK3CD	S1	1.61613
1.87704e-18	1.38447	0.54	0.242	3.38881e-14	HNSCC	PIK3CD	S2	1.38447
3.03511e-24	5.2539	0.738	0.321	5.47958e-20	HNSCC	PIK3CD	S3	5.2539
2.20891e-05	12.1572	0.722	0.537	0.398797	SIN	PIK3CD	S4	12.1572
8.02849e-22	2.21307	0.891	0.504	1.44946e-17	HNSCC	PIK3R1	S1	2.21307
1.19934e-10	2.82127	0.622	0.431	2.16529e-06	NOM	PIK3R1	S2	2.82127
2.2767e-09	1.10737	0.722	0.476	4.11035e-05	SIN	PIK3R1	S2	1.10737
1.71696e-11	5.83942	0.703	0.271	3.0998e-07	SIN	PIK3R1	S3	5.83942
2.29744e-39	6.10595	0.994	0.738	4.1478e-35	HNSCC	PIK3R1	S4	6.10595
6.71097e-05	1.39183	0.634	0.456	1	NOM	PIK3R1	S5	1.39183
0.00417556	1.00448	0.624	0.45	1	HNSCC	PIK3R1	S5	1.00448
0.00187712	0.628162	0.457	0.28	1	HNSCC	PIK3R1	S6	0.628162
5.14528e-14	5.64214	0.964	0.772	9.28929e-10	HNSCC	PIK3R2	S1	5.64214
8.30494e-15	16.3545	0.911	0.691	1.49937e-10	SIN	PIK3R2	S2	16.3545
1.41024e-17	4.31515	0.803	0.436	2.54604e-13	HNSCC	PIK3R2	S3	4.31515
7.74886e-38	3.87875	0.974	0.699	1.39898e-33	HNSCC	PIK3R2	S4	3.87875
7.81149e-07	1.26307	0.644	0.432	0.0141029	NOM	PIK3R2	S5	1.26307
9.19335e-10	3.40487	0.917	0.443	1.65977e-05	SIN	PIK3R2	S5	3.40487
0.00185734	1.28134	0.552	0.371	1	HNSCC	PIK3R2	S6	1.28134
3.85664e-13	2.14552	0.717	0.379	6.96278e-09	HNSCC	PIK3R3	S1	2.14552
4.76856e-11	2.03493	0.57	0.254	8.60916e-07	SIN	PIK3R3	S2	2.03493
0.00138967	0.743441	0.378	0.18	1	SIN	PIK3R3	S3	0.743441
2.78504e-08	0.380747	0.306	0.104	0.000502811	HNSCC	PIK3R3	S3	0.380747
4.78234e-11	3.26765	0.648	0.366	8.63404e-07	SIN	PIK3R3	S4	3.26765
4.47909e-09	2.8603	0.833	0.578	8.08655e-05	HNSCC	PLCG1	S1	2.8603
0.00161965	0.851239	0.582	0.477	1	SIN	PLCG1	S2	0.851239
2.58709e-09	1.85288	0.629	0.412	4.67073e-05	HNSCC	PLCG1	S2	1.85288
9.23581e-18	1.8442	0.603	0.246	1.66743e-13	HNSCC	PLCG1	S3	1.8442
0.00264836	0.39256	0.39	0.212	1	HNSCC	PLCG1	S6	0.39256
0.00317347	1.22551	0.846	0.654	1	HNSCC	PMAIP1	S5	1.22551
3.27852e-11	1.31493	0.794	0.588	5.91904e-07	HNSCC	PPP3CA	S2	1.31493
1.34516e-14	2.856	0.703	0.421	2.42855e-10	HNSCC	PPP3CA	S3	2.856
1.22569e-08	6.56358	0.889	0.507	0.000221287	SIN	PPP3CA	S5	6.56358
4.0409e-05	0.624603	0.533	0.295	0.729545	HNSCC	PPP3CA	S6	0.624603
0.00282497	0.309916	0.823	0.725	1	SIN	PPP3CB	S2	0.309916
8.67063e-13	1.74907	0.882	0.655	1.56539e-08	HNSCC	PPP3CB	S2	1.74907
4.01863e-21	2.38089	0.86	0.518	7.25523e-17	HNSCC	PPP3CB	S3	2.38089
8.91579e-14	1.85949	0.948	0.743	1.60966e-09	HNSCC	PPP3CB	S4	1.85949
9.65765e-15	1.63148	0.725	0.319	1.74359e-10	HNSCC	PPP3CC	S1	1.63148
0.00171243	0.65861	0.544	0.378	1	SIN	PPP3CC	S2	0.65861
0.000778189	2.03541	0.459	0.229	1	SIN	PPP3CC	S3	2.03541
0.000180838	4.41717	0.62	0.414	1	SIN	PPP3CC	S4	4.41717
1.71976e-06	11.1113	0.891	0.793	0.0310486	HNSCC	PPP3R1	S1	11.1113
2.7096e-10	2.94327	0.871	0.721	4.89191e-06	HNSCC	PPP3R1	S2	2.94327
0.000129545	0.593639	0.838	0.672	1	SIN	PPP3R1	S3	0.593639
2.47349e-17	3.08118	0.838	0.557	4.46564e-13	HNSCC	PPP3R1	S3	3.08118
0.00424614	3.62722	0.861	0.894	1	SIN	PPP3R1	S4	3.62722
5.72068e-05	2.92062	0.752	0.645	1	NOM	PPP3R1	S5	2.92062
1.67114e-07	1.78503	0.944	0.645	0.00301708	SIN	PPP3R1	S5	1.78503
0.00153266	1.81262	0.591	0.344	1	NOM	PPP3R1	S6	1.81262
0.000112955	0.611458	0.231	0.089	1	HNSCC	PRF1	S5	0.611458
0.000362818	0.313838	0.179	0.075	1	HNSCC	PRKCQ	S3	0.313838
3.54304e-07	0.917328	0.361	0.166	0.00639661	HNSCC	PRKCQ	S4	0.917328
1.48887e-07	5.01515	0.818	0.61	0.00268801	NOM	PTEN	S1	5.01515
1.45782e-22	1.6778	0.886	0.646	2.63195e-18	HNSCC	PTEN	S2	1.6778
9.18254e-08	2.31003	0.642	0.429	0.00165782	HNSCC	PTEN	S3	2.31003
3.57636e-32	8.45029	1	0.847	6.45676e-28	HNSCC	PTEN	S4	8.45029
0.000378805	2.52278	0.644	0.541	1	NOM	PTEN	S5	2.52278
4.5958e-07	1.42998	0.889	0.535	0.00829726	SIN	PTEN	S5	1.42998
5.22464e-16	1.49713	0.574	0.293	9.43257e-12	HNSCC	PTPN11	S2	1.49713
9.00216e-08	0.835359	0.397	0.193	0.00162525	HNSCC	PTPN11	S3	0.835359
1.65321e-16	1.58338	0.774	0.468	2.9847e-12	HNSCC	PTPN11	S4	1.58338
0.000600494	0.379288	0.556	0.271	1	SIN	PTPN11	S5	0.379288
3.65929e-09	4.17349	0.79	0.466	6.60648e-05	HNSCC	PTPN6	S1	4.17349
3.76264e-12	0.701026	0.607	0.354	6.79307e-08	HNSCC	PTPN6	S2	0.701026
5.1146e-05	1.532	0.649	0.335	0.923389	SIN	PTPN6	S3	1.532
7.09571e-07	0.98678	0.467	0.268	0.0128106	HNSCC	PTPN6	S3	0.98678
0.000714045	7.35883	0.787	0.623	1	SIN	PTPN6	S4	7.35883
0.000340375	1.85994	0.611	0.349	1	SIN	PTPN6	S5	1.85994
1.80413e-05	1.66329	0.799	0.749	0.325718	NOM	RAF1	S2	1.66329
0.00487028	1.50859	0.797	0.764	1	SIN	RAF1	S2	1.50859
1.95907e-07	3.10297	0.772	0.591	0.00353691	NOM	RAF1	S5	3.10297
1.61192e-05	1.52651	0.752	0.523	0.291016	HNSCC	RAF1	S6	1.52651
0.000285562	4.09383	0.364	0.255	1	HNSCC	RASGRP1	S2	4.09383
1.91497e-05	1.55713	0.459	0.182	0.345729	SIN	RASGRP1	S3	1.55713
5.11563e-08	1.03604	0.416	0.166	0.000923577	NOM	RASGRP1	S5	1.03604
0.000233427	1.70133	0.472	0.205	1	SIN	RASGRP1	S5	1.70133
2.27733e-07	1.0305	0.4	0.114	0.00411149	HNSCC	RASGRP1	S6	1.0305
9.37166e-13	2.26016	0.827	0.628	1.69196e-08	HNSCC	RELA	S2	2.26016
0.000574619	0.571779	0.677	0.536	1	HNSCC	RELA	S3	0.571779
C	29.5758	0.978	0.871	3.89897e-20	HNSCC	STAT1	S1	29.5758
1.22167e-56	45.4231	0.989	0.713	2.20561e-52	HNSCC	STAT1	S2	45.4231
2.06907e-29	11.8172	0.926	0.525	3.7355e-25	HNSCC	STAT1	S3	11.8172
6.67359e-23	15.0129	0.991	0.861	1.20485e-18	SIN	STAT1	S4	15.0129
1.81617e-18	9.122	0.886	0.439	3.27892e-14	HNSCC	STAT1	S6	9.122
1.48145e-22	4.92262	0.938	0.766	2.67461e-18	HNSCC	STAT3	S2	4.92262
8.14607e-07	2.65794	0.822	0.73	0.0147069	NOM	STAT3	S5	2.65794
4.77989e-05	1.43582	0.676	0.432	0.862961	HNSCC	STAT3	S6	1.43582
1.52308e-13	1.28351	0.673	0.44	2.74977e-09	HNSCC	TICAM1	S2	1.28351
0.00121087	0.602911	0.676	0.441	1	SIN	TICAM1	S3	0.602911
1.07904e-06	0.310119	0.188	0.071	0.0194809	HNSCC	TICAM2	S2	0.310119
4.50292e-06	0.44876	0.227	0.082	0.0812957	HNSCC	TICAM2	S3	0.44876
1.63231e-07	1.25421	0.484	0.275	0.00294697	HNSCC	TICAM2	S4	1.25421
0.000410814	0.353035	0.192	0.086	1	HNSCC	TICAM2	S3	0.353035
3.94743e-20	1.64997	0.493	0.19	7.12669e-16	HNSCC	TLR2	S2	1.64997
5.8459e-06	1.04439	0.498	0.296	0.105542	HNSCC	TLR2	S3	1.04439
0.00197237	1.04439	0.19	0.061	1	HNSCC	TLR2	S6	1.04439
7.50268e-11	0.846888	0.417	0.144	1.35453e-06	SIN	TLR4	S4	0.846888
0.000114547	1.21111	0.413	0.233	1	HNSCC	TRAF6	S1	1.21111
0.00624173	0.616959	0.332	0.241	1	NOM	TRAF6	S2	0.616959
5.36915e-05	0.439605	0.293	0.146	0.969346	HNSCC	TRAF6	S3	0.439605
4.12278e-05	0.366027	0.69	0.504	0.744326	HNSCC	TRAF6	S4	0.366027
2.55504e-07	3.06865	0.435	0.203	0.00461288	HNSCC	ZAP70	S1	3.06865
0.00780368	0.351899	0.241	0.13	1	SIN	ZAP70	S2	0.351899
1.37254e-05	0.5063	0.213	0.103	0.247799	HNSCC	ZAP70	S2	0.5063
0.000622028	0.459278	0.179	0.079	1	HNSCC	ZAP70	S3	0.459278
6.50628e-24	10.879	0.528	0.116	1.17464e-19	SIN	ZAP70	S4	10.879
0.00597229	0.366152	0.361	0.18	1	SIN	ZAP70	S5	0.366152
					SIN		S1
					NOM		S3
